# Supplementary material
Source: PubMed Central journal article supplement (PMC4111976)
Supplement: NIHMS572774-supplement-01.pdf [file NIHMS572774-supplement-01.pdf]

**Table S1.** Food group factor loadings for five empirically derived dietary patterns in the Reasons for Geographic and Racial Differences in Stroke (REGARDS) Study.

| Food Groups                      | Convenience | Plant-Based | Sweets/Fats | Southern | Alcohol/Salads |
|----------------------------------|-------------|-------------|-------------|----------|----------------|
| Proportion of variance explained | 0.09        | 0.06        | 0.04        | 0.03     | 0.03           |
| 100% fruit juice                 |             | 0.24457     |             | 0.21689  | -0.18167       |
| Added fats                       |             |             | 0.54585     | 0.22513  | 0.19722        |
| Beans                            | 0.38631     | 0.36646     |             |          |                |
| Beer                             |             | -0.17745    |             |          | 0.22928        |
| Breads                           |             |             | 0.55127     | 0.21518  |                |
| Butter                           |             |             | 0.21619     |          | 0.30032        |
| Candy                            |             |             |             |          |                |
| Cereal                           | 0.19573     |             |             | -0.21393 | -0.17702       |
| Chinese food                     | 0.38699     |             |             |          | 0.2111         |
| Chocolate                        |             |             |             |          |                |
| Coffee                           |             |             | 0.26976     | -0.34508 | 0.2368         |
| Condiments                       | 0.23909     |             | 0.30776     |          | 0.26652        |
| Desserts                         | 0.15373     |             | 0.2902      | 0.16663  | -0.17762       |
| Eggs and egg dishes              |             |             | 0.34672     | 0.26351  | 0.25323        |
| Fish                             | 0.19803     | 0.36327     | -0.16313    | 0.20797  | 0.27669        |
| Fried food                       | 0.16457     |             | 0.17846     | 0.61561  |                |
| Fried potatoes                   | 0.37897     |             | 0.30379     |          |                |
| Fruit                            |             | 0.58686     |             |          |                |
| Grain desserts                   |             |             | -0.19645    |          |                |
| Highfat dairy                    | 0.15945     |             | 0.24471     |          | 0.18819        |
| Liquor                           |             |             |             |          | 0.31217        |
| Lowfat dairy                     |             | 0.20837     |             |          |                |
| Margarine                        |             |             | 0.36925     |          |                |
| Meal replacement drink           |             |             |             |          |                |
| Mexican dishes                   | 0.47479     |             |             |          |                |
| Milk                             |             | 0.16637     | 0.1528      | -0.30376 |                |
| Milk alternatives                |             | 0.17566     |             |          |                |
| Miscellaneous sugar              |             |             | 0.56957     |          |                |
| Mixed dishes with meat           | 0.54286     |             |             |          |                |
| Organ meat                       |             |             |             | 0.50982  |                |
| Pasta dishes                     | 0.608       |             |             |          |                |
| Pizza                            | 0.45298     | -0.18451    |             |          |                |
| Potatoes                         | 0.44255     |             | 0.33612     |          |                |
| Poultry                          | 0.23489     | 0.30172     |             | 0.17885  | 0.18324        |
| Processed meats                  | 0.22392     |             | 0.33863     | 0.40133  | 0.19096        |
| Red meat                         | 0.52887     |             | 0.25565     | 0.16486  | 0.22002        |
| Refined grains                   | 0.25929     |             |             | 0.26162  |                |
| Salad dressing/sauces            |             | 0.29853     |             |          | 0.55915        |
| Salty snacks                     | 0.27113     |             |             |          |                |
| Seeds, nuts                      |             | 0.2605      |             |          | 0.20431        |
| Shell fish                       | 0.19676     |             |             | 0.30935  | 0.29563        |
| Soda                             |             | -0.23717    | 0.15409     | 0.23255  |                |
| Soup                             | 0.48925     | 0.30653     |             |          |                |
| Sugar-sweetened beverages        |             |             |             | 0.40413  | -0.15297       |
| Sweet breakfast foods            |             |             | 0.28964     | 0.17832  | -0.15384       |
| Tea                              |             |             | 0.35332     | -0.16204 |                |
| Vegetable - cruciferous          |             | 0.58894     |             |          |                |
| Vegetable - dark yellow          |             | 0.40711     |             |          | -0.15137       |
| Vegetable - green leafy          |             | 0.49789     |             | -0.15575 | 0.51508        |
| Vegetable - other                |             | 0.48715     |             |          |                |
| Vegetable - tomato               |             | 0.31321     |             |          | 0.25498        |
| Vegetable mixed dishes           | 0.40609     | 0.29617     |             |          | -0.22112       |
| Water                            |             | 0.31938     |             |          |                |
| Whole grains                     |             | 0.461       |             |          |                |
| Wine                             |             |             |             |          | 0.38365        |
| Yogurt                           |             | 0.33051     | -0.17029    |          |                |
