# Supplementary material
Source: PubMed Central journal article supplement (PMC4111976)
Supplement: NIHMS572774-supplement-02.pdf [file NIHMS572774-supplement-02.pdf]

**Table S2.** Hazard ratios of end-stage renal disease (95% confidence intervals) as a function of dietary pattern scores accounting for competing risk of death from other causes. For each pattern, quartile 1 represents least consistency with while quartile 4 represents most consistency with the pattern.

|                       |            | Q1  | Q2                | Q3                | Q4                | Per 1 unit increase in Pattern score |
|-----------------------|------------|-----|-------------------|-------------------|-------------------|--------------------------------------|
| <b>Convenience</b>    | Events     | 44  | 38                | 39                | 20                |                                      |
|                       | HR Model 1 | ref | 0.95 (0.61, 1.47) | 1.08 (0.69, 1.69) | 0.60 (0.33, 1.11) | 0.91 (0.71, 1.15)                    |
|                       | HR Model 2 | ref | 1.36 (0.85, 2.18) | 1.30 (0.77, 2.19) | 0.72 (0.38, 1.37) | 1.00 (0.81, 1.25)                    |
| <b>Plant Based</b>    | Events     | 44  | 34                | 31                | 32                |                                      |
|                       | HR Model 1 | ref | 0.76 (0.48, 1.19) | 0.74 (0.46, 1.19) | 0.85 (0.54, 1.37) | 1.09 (0.91, 1.29)                    |
|                       | HR Model 2 | ref | 1.05 (0.63, 1.75) | 0.74 (0.42, 1.30) | 1.14 (0.66, 1.97) | 1.18 (0.94, 1.47)                    |
| <b>Sweets/Fats</b>    | Events     | 45  | 32                | 40                | 24                |                                      |
|                       | HR Model 1 | ref | 0.88 (0.55, 1.39) | 1.36 (0.86, 2.17) | 0.99 (0.55, 1.78) | 1.08 (0.88, 1.34)                    |
|                       | HR Model 2 | ref | 0.91 (0.57, 1.44) | 1.32 (0.76, 2.31) | 1.01 (0.49, 2.07) | 1.15 (0.85, 1.55)                    |
| <b>Southern</b>       | Events     | 20  | 36                | 43                | 42                |                                      |
|                       | HR Model 1 | ref | 1.36 (0.77, 2.38) | 1.30 (0.74, 2.29) | 1.26 (0.68, 2.33) | 1.27 (1.01, 1.59)                    |
|                       | HR Model 2 | ref | 1.38 (0.80, 2.36) | 1.03 (0.59, 1.78) | 0.74 (0.36, 1.53) | 0.95 (0.74, 1.22)                    |
| <b>Alcohol/Salads</b> | Events     | 42  | 44                | 33                | 22                |                                      |
|                       | HR Model 1 | ref | 1.14 (0.75, 1.74) | 0.91 (0.56, 1.46) | 0.73 (0.42, 1.26) | 0.87 (0.72, 1.06)                    |
|                       | HR Model 2 | ref | 1.06 (0.64, 1.75) | 1.21 (0.72, 2.03) | 0.87 (0.48, 1.58) | 0.95 (0.74, 1.20)                    |

Abbreviations: Q, quartile; HR, hazard ratio.

Model 1 is adjusted for age, gender, race, geographic region of residence, and energy intake. Model 2 is adjusted for variables in Model 1 plus lifestyle factors (self-reported frequency of exercise per week, current smoking), comorbidities (history of heart disease and hypertension), educational achievement (< vs. ≥ high school diploma), annual family income (< vs. ≥ \$20,000/year), and natural log-transformed urinary albumin to creatinine ratio, and estimated glomerular filtration rate.
